# Supplementary material
Source: Research Square preprint supplement (doi:10.21203/rs.3.rs-8781848/v1)
Supplement: Supplementary file 1 [file 215f64e87c37fac48affb534.docx]

# **Supplementary file 1** House Risks Assessment

| **House environment** | **Yes**  **(1 score)** | **No**  **(0 score)** |
| --- | --- | --- |
| Living on the second floor |  |  |
| Inadequate lighting inside and outside the house |  |  |
| Slippery floors or uneven surfaces |  |  |
| Presence of a step or threshold at doorways |  |  |
| Absence of handrails on both sides of staircases |  |  |
| Absence of a bed or sleeping on mattress on the floor |  |  |
| Bathroom located outside the house or distant from the bedroom |  |  |
| Use of a squatting toilet |  |  |
| Inappropriate height of light switches |  |  |
| Inappropriate height of kitchen counters |  |  |
| **Total** |  |  |
