# Supplementary material
Source: Research Square preprint supplement (doi:10.21203/rs.3.rs-8781848/v1)
Supplement: Supplementary file 4 [file e35c73f2ead762d657137b7e.docx]

**Supplementary file 2** Fall prevention behavior Questionnaire

**Instructions:** Please select the response that best reflects your usual behavior. Each item has three response options:

Regularly You consistently perform this behavior.

Sometimes You perform this behavior occasionally.

Never You do not perform this behavior at all.

| **Fall prevention behavior** | **Frequency** | | |
| --- | --- | --- | --- |
| **Regularly** | **Sometimes** | **Never** |
| You take care when standing up and sitting down and going up and down stairs. You avoid or take care walking where the floor is slippery or uneven. |  |  |  |
| You change positions correctly, sitting and standing slowly with confidence. |  |  |  |
| You use a firm support when reaching or bending down. |  |  |  |
| You wear shoes that fit your feet. |  |  |  |
| You wear flat shoes. |  |  |  |
| Your shoes have good traction on the floor. |  |  |  |
| You wear clothes that fit well, are not too loose or have long pants that drag on the floor. |  |  |  |
| You go for regular eye check-ups and seek treatment when you have problems. |  |  |  |
| You always consult your doctor when you have problems with taking your medication or side effects such as dizziness or faintness. |  |  |  |
| You only take your own medication, such as sleeping pills. |  |  |  |
| You exercise at least 30 minutes a day. |  |  |  |
| You do exercises that increase muscle strength and balance. |  |  |  |
| You keep your bathroom floor dry and separate wet and dry areas. |  |  |  |
| You keep your things in your house organized and keep walkways clear. |  |  |  |
| You make sure extension cords do not across walkways to prevent trips and falls. |  |  |  |
| Your house is well let so that you can see walkways and stairs clearly. |  |  |  |
| You place your regularly used items within easy to reach – not too high. |  |  |  |
| You take care of and prepare your aids and equipment to help getting up and sitting down. |  |  |  |
